# Supplementary material for: Who Has Seen Patients With ST‐Segment–Elevation Myocardial Infarction? First Results From Italian Real‐World Coronavirus Disease 2019
Source: PubMed Central journal article supplement — J Am Heart Assoc. 2020 Sep 29;9(19):e017126. doi: 10.1161/JAHA.120.017126 (PMC7792389; doi:10.1161/jaha.120.017126), 2020-09-29
Supplement: JAH3-9-e017126-s001.pdf [file JAH3-9-e017126-s001.pdf]

# **SUPPLEMENTAL MATERIAL**

**Table S1. Logistic and Linear Regression analysis of 2020 group.**

| Variable                         | 2020 Group |                       | ΔLVEF   |                | In Hospital stay (days) |                | Symptoms to Wire (min) |                        |
|----------------------------------|------------|-----------------------|---------|----------------|-------------------------|----------------|------------------------|------------------------|
|                                  | P value    | CI (95%)              | P value | CI (95%)       | P value                 | CI (95%)       | P value                | CI (95%)               |
| <b>Age</b>                       | 0,296      | -7,255 - 24,814       | 0,536   | -0,242 – 0,085 | 0,130                   | 0,089 – 0,400  | 0,644                  | -109,109 – 42,756      |
| <b>Male</b>                      | 0,216      | -172,639 -<br>583,851 | 0,169   | -7,531 – 1,192 | 0,337                   | -1,512 – 4,605 | 0,206                  | -596,371 –<br>5109,518 |
| <b>Dyslipidemia</b>              | 0,112      | -19,367 - -1,497      | 0,248   | -1,077 – 5,332 | 0,807                   | -1,715 – 2,848 | 0,310                  | -2244,592 –<br>600,401 |
| <b>Smoke</b>                     | 0,898      | -39,777 – -20,102     | 0,991   | -3,450 – 4,172 | 0,045                   | -6,809 – 1,099 | 0,723                  | -1491,716 –<br>840,331 |
| <b>Diabetes</b>                  | 0,171      | -39,077 - -0,794      | 0,297   | -1,916 – 5,940 | 0,918                   | -3,066 – 2,804 | 0,158                  | -2538,391 –<br>106,635 |
| <b>Hypertension</b>              | 0,112      | -21,333 – -1,102      | 0,107   | -0,501 – 6,645 | 0,322                   | -3,279 – 0,806 | 0,257                  | -2142,810 –<br>380,797 |
| <b>Family history of<br/>CVD</b> | 0,144      | -7,876 - 1,161        | 0,477   | -2,733 – 5,792 | 0,883                   | -2,363 – 3,707 | 0,508                  | -1945,491 –<br>731,024 |

|                     |       |                   |       |                |       |                    |       |                        |
|---------------------|-------|-------------------|-------|----------------|-------|--------------------|-------|------------------------|
| <b>Previous ACS</b> | 0,332 | -22,969 – 103,846 | 0,358 | -8,336 – 5,156 | 0,085 | -10,216 –<br>0,496 | 0,788 | 1790,782 –<br>1242,872 |
|---------------------|-------|-------------------|-------|----------------|-------|--------------------|-------|------------------------|

Δ left ventricular ejection fraction, in hospital stay (days) and symptoms to wire (minutes).

2-sided p value <0.05 were considered of statistical significance. CI indicates confidence interval; LVEF, left ventricular ejection fraction; CVD, cardiovascular disease; ACS, acute coronary syndrome.
